# Supplementary material for: Facile synthesis of porous Co3O4nanoflakes as an interlayer for high performance lithium–sulfur batteries
Source: Royal Society of Chemistry journal article supplement (doi:10.1039/d0dt00429d), 2020-01-01
Supplement: d0dt00429d1.pdf [file d0dt00429d1.pdf]

## Supporting Information

### Facile Synthesis of Porous $\text{Co}_3\text{O}_4$ Nanoflakes as an Interlayer for High Performance Lithium-Sulfur Batteries

Xiao-Xiao Zheng<sup>a,b</sup>, Shi-Xi Zhao<sup>a\*</sup>, Jin-Lin Yang<sup>a,b</sup>, Yi-Ming Lu<sup>a,b</sup>, Qi-Long Wu<sup>a,b</sup> and Xiang-Tian Zeng<sup>a,b</sup>

<sup>a</sup>Shenzhen International Graduate School, Tsinghua University, Shenzhen, 518055, China.

<sup>b</sup>School of Materials Science and Engineering, Tsinghua University, Beijing, 100084, China

\*Corresponding author: Email: [zhaosx@sz.tsinghua.edu.cn](mailto:zhaosx@sz.tsinghua.edu.cn) (S.X.Zhao);

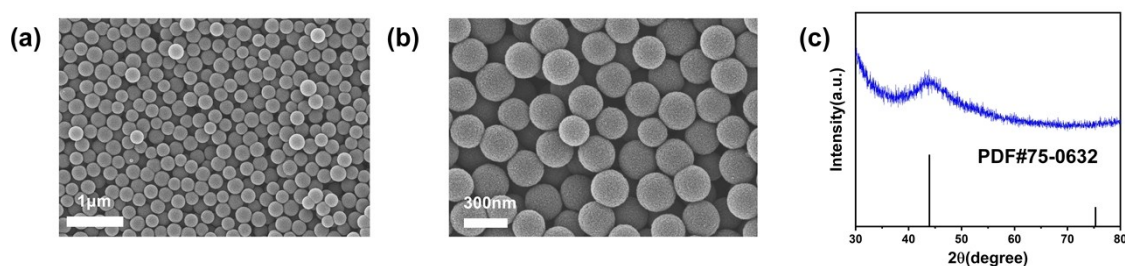

Fig. S1 (a-b) SEM images and (c) XRD of carbon spheres.

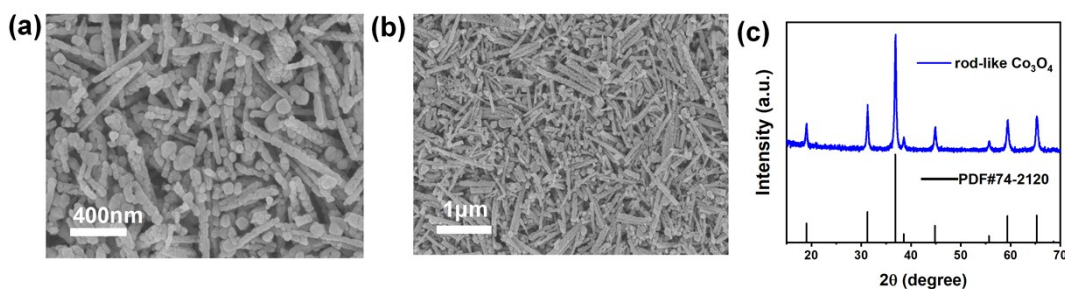

Fig. S2 (a-b) SEM images and (c) XRD of rod-like  $\text{Co}_3\text{O}_4$ .

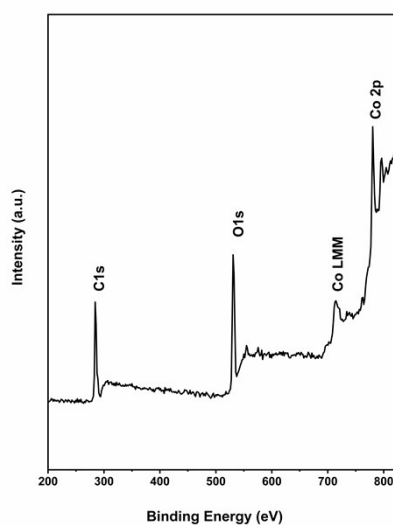

Fig. S3 XPS spectrum of  $\text{Co}_3\text{O}_4$

**Table S1** the relative content of  $\text{Co}^{2+}$  and  $\text{Co}^{3+}$  before and after adsorption

| Adsorption state  | $\text{Co}^{2+}$ (%) | $\text{Co}^{3+}$ (%) |
|-------------------|----------------------|----------------------|
| Before adsorption | 40.4                 | 59.6                 |
| After adsorption  | 48.6                 | 51.4                 |

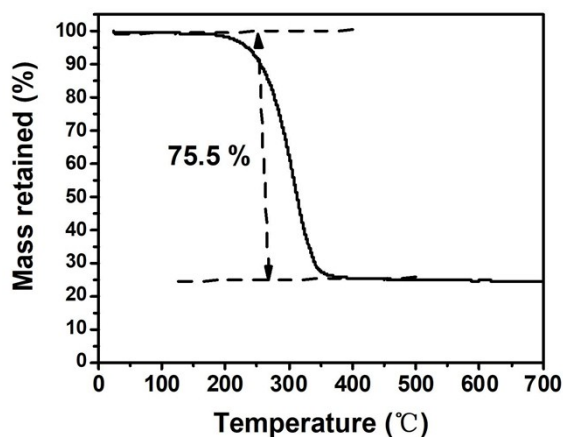**Fig. S4** Thermogravimetric analysis (TGA) curve of carbon black-sulfur cathode with a heating rate of  $5\text{ }^\circ\text{C min}^{-1}$ .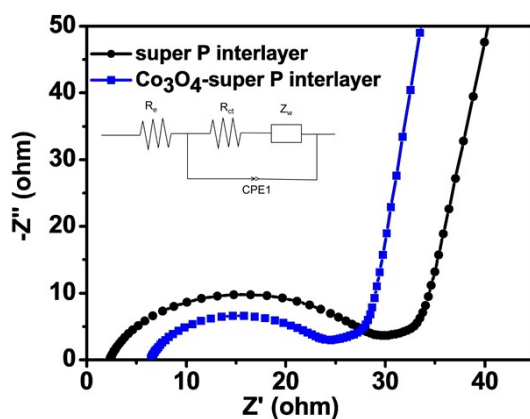**Fig. S5** Nyquist plots of  $\text{Co}_3\text{O}_4$ -super P interlayer and super P interlayer and equivalent circuit (inset).**Table S2** EIS fitting results of cells with  $\text{Co}_3\text{O}_4$ -super P interlayer and super P interlayer

| Interlayer                       | $R_{ct}$ ( $\Omega$ ) | $R_s$ ( $\Omega$ ) |
|----------------------------------|-----------------------|--------------------|
| $\text{Co}_3\text{O}_4$ -super P | 19.4                  | 6.4                |
| Super P                          | 26.9                  | 2.3                |
